# Supplementary material for: The influence of global climate change on accumulation and toxicity of persistent organic pollutants and chemicals of emerging concern in Arctic food webs
Source: Royal Society of Chemistry journal article supplement (doi:10.1039/d1em00469g), 2022-01-01
Supplement: d1em00469g1.pdf [file d1em00469g1.pdf]

### **Supplementary information**

The influence of global climate change on accumulation and toxicity of persistent organic pollutants and chemicals of emerging Arctic concern in Arctic food webs

Katrine Borgå, Melissa A. McKinney, Heli Routti, Kim J. Fernie, Julia Giebichenstein, Ingeborg Hallanger, Derek C. G. Muir

**Table S1** Summary of predicted and empirical evidence, conclusions, and knowledge gaps for global climate change-related effects on contaminant exposure and bioaccumulation in Arctic food webs. Arrows signify evidence of increased (↑), decreased (↓), mixed (↑↓), or no influence (↔) of environmental or ecological change.

| Climate-related change                                                                                                            | Effect on contaminant exposure and bioaccumulation in Arctic biota and food webs                                                                                                                                                           |                                                                                                                                                                                                                                                                                                                                                                                                                                                                                                                                                                                                                                                             |
|-----------------------------------------------------------------------------------------------------------------------------------|--------------------------------------------------------------------------------------------------------------------------------------------------------------------------------------------------------------------------------------------|-------------------------------------------------------------------------------------------------------------------------------------------------------------------------------------------------------------------------------------------------------------------------------------------------------------------------------------------------------------------------------------------------------------------------------------------------------------------------------------------------------------------------------------------------------------------------------------------------------------------------------------------------------------|
|                                                                                                                                   | Predicted                                                                                                                                                                                                                                  | Empirical/Correlational                                                                                                                                                                                                                                                                                                                                                                                                                                                                                                                                                                                                                                     |
| Abiotic changes                                                                                                                   |                                                                                                                                                                                                                                            |                                                                                                                                                                                                                                                                                                                                                                                                                                                                                                                                                                                                                                                             |
| Increased temperature                                                                                                             | ↑ LRT                                                                                                                                                                                                                                      | ↑ LRT                                                                                                                                                                                                                                                                                                                                                                                                                                                                                                                                                                                                                                                       |
| ↑↓ Chemical fate and behavior                                                                                                     | ↑ Mobilization of POPs from primary and secondary sources<br><br>↔ Contaminant uptake and elimination rates in fish (modeled)<br><br>↔ Bioaccumulation in Barents Sea food web (modeled)                                                   | ↑ Mobilization of POPs from primary and secondary sources                                                                                                                                                                                                                                                                                                                                                                                                                                                                                                                                                                                                   |
| Altered climate patterns<br>↑↓ Atmospheric circulation<br>↑↓ Ocean circulation<br>↑↓ Wind and precipitation patterns              | None identified                                                                                                                                                                                                                            | POPs ↑ in gulls, ringed seals and landlocked Arctic char with AO+/NAO+ in preceding year<br><br>POPs ↓ in gulls with AO+ in current winter<br><br>POPs and/or OCPs ↑ or ↓ in murrens and/or fulmars 4-9 years after high rainfall and/or NAO+ or NAO-<br><br>Declining trends of some POPs in ringed seals slowed in years with greater influx of Atlantic currents                                                                                                                                                                                                                                                                                         |
| Reduced sea ice<br>↓ Sea ice cover<br>↓ Sea ice season<br>↓ Multi-year ice<br>↑ First-year ice                                    | None identified                                                                                                                                                                                                                            | Pesticides ↑↓ in zooplankton and ice fauna in areas with more sea ice in the Barents Sea<br><br>Lipophilic POPs ↑ in ringed seals in years with early sea ice break up in the Beaufort Sea<br><br>PCB-153 ↑ in ringed seals in years with shorter duration of sea ice in West Greenland<br><br>Lipophilic POPs ↑ in ringed seals with high total or multi-year sea ice in the Canadian Arctic<br><br>Lipophilic POPs ↑ in polar bears in areas and seasons with low sea ice extent around Svalbard<br><br>Lipophilic POPs and PFAS ↑ in polar bears with high quality sea ice habitat<br><br>β-HCH and PFAS ↑ in Arctic foxes with increasing sea ice cover |
| Increased terrestrial runoff to surface waters<br>↑ Glacial and snow meltwater discharge<br>↑ Precipitation and associated runoff | ↑ Mobilization of POPs from secondary sources<br><br>↑ Release of POPs to lakes and coastal regions<br><br>↑ Darkening and browning of lakes and rivers and coastal waters leading to ↑↓ changes to trophic structure and transfer of POPs | POPs ↔ in Arctic char in waters with glacial discharge or increased turbidity<br><br>POPs ↓ in littoral amphipods with increasing run-off during melt season                                                                                                                                                                                                                                                                                                                                                                                                                                                                                                |

| References                                                                                                         | Conclusions                                                                                                                                                                                                                | Knowledge Gaps                                                                                                                                                                                                                                                                                   |
|--------------------------------------------------------------------------------------------------------------------|----------------------------------------------------------------------------------------------------------------------------------------------------------------------------------------------------------------------------|--------------------------------------------------------------------------------------------------------------------------------------------------------------------------------------------------------------------------------------------------------------------------------------------------|
| MacLeod et al., this issue<br>Halsall et al., this issue                                                           | Changes in sources and emissions could impact exposure in biota and will be important for interpreting observed changes                                                                                                    |                                                                                                                                                                                                                                                                                                  |
| Gouin et al., 2013                                                                                                 | Climate-related temperature increases may have minimal impacts on bioaccumulation, due to species-specific biotransformation capacities and thermal tolerances                                                             |                                                                                                                                                                                                                                                                                                  |
| Borgå et al., 2010                                                                                                 | Seasonal variations in temperature could influence bioaccumulation on smaller time scales                                                                                                                                  |                                                                                                                                                                                                                                                                                                  |
| Bustnes et al., 2010<br>Rigét et al., 2013<br>Houde et al., 2019<br>Cabrerizo et al., 2018b<br>Foster et al., 2019 | Higher concentrations of POPs in Arctic biota observed following NAO+/AO+ states and influx of Atlantic oceanic currents suggest higher exposure following transport of air and water masses from North America and Europe | Unknown underlying mechanisms of statistical relationship between AO/NAO and POPs in biota<br>No data for terrestrial species<br>Effects of intermittent extreme weather events unknown<br>Little understanding of the variance allocation to confounding factors for large regional differences |
| Carlsson et al., 2014<br>Borgå et al., 2002a,b                                                                     | Melting of multi-year sea ice may release stored contaminants into the Arctic marine food web or may dilute and reduce contaminants at base of the food web                                                                | Contrasting results indicate sea ice may be a source of POPs/CEACs or dilute POP/CEACs                                                                                                                                                                                                           |
| Gaden et al., 2012                                                                                                 | Separating the direct effects of declining sea ice cover on biota POP levels from the indirect effects from changes in food web structure and function are difficult                                                       | Little is known regarding the match/mismatched of ice melt and biological production and the effect on POP/CEAC accumulation                                                                                                                                                                     |
| Rigét et al., 2013a                                                                                                |                                                                                                                                                                                                                            | Differences between POPs and CEACs                                                                                                                                                                                                                                                               |
| Houde et al., 2019                                                                                                 |                                                                                                                                                                                                                            | Processes largely unknown apart from biotic processes                                                                                                                                                                                                                                            |
| Tartu et al., 2017b                                                                                                |                                                                                                                                                                                                                            |                                                                                                                                                                                                                                                                                                  |
| Tartu et al., 2017a<br>Routti et al., 2017<br>Tartu et al., 2018<br>Blévin et al., 2020                            |                                                                                                                                                                                                                            |                                                                                                                                                                                                                                                                                                  |
| Andersen et al., 2015a<br>Routti et al., 2017                                                                      |                                                                                                                                                                                                                            |                                                                                                                                                                                                                                                                                                  |
| Cabrerizo et al., 2018b                                                                                            | Findings are based on the effects of glacial sources on Arctic freshwater biota and food webs are limited                                                                                                                  | Effect of terrestrial-deposited snow and melting glaciers on POP accumulation in receiving freshwater, coastal marine, and terrestrial food webs                                                                                                                                                 |
| Skogsberg, 2019                                                                                                    | Increased runoff may dilute and reduce bioavailable fraction of contaminants at base of food web                                                                                                                           | Net result of terrestrial runoff on contaminant accumulation in Arctic biota still unknown due to large seasonal variations                                                                                                                                                                      |

**Table S1. continued**

| Climate-related change                                                                                                                             | Effect on contaminant exposure and bioaccumulation in Arctic biota and food webs                                                                   |                                                                                                                                                                                                                                                                                                                                                                                                                                                           |
|----------------------------------------------------------------------------------------------------------------------------------------------------|----------------------------------------------------------------------------------------------------------------------------------------------------|-----------------------------------------------------------------------------------------------------------------------------------------------------------------------------------------------------------------------------------------------------------------------------------------------------------------------------------------------------------------------------------------------------------------------------------------------------------|
|                                                                                                                                                    | Predicted                                                                                                                                          | Empirical/Correlational                                                                                                                                                                                                                                                                                                                                                                                                                                   |
| Freshwater hydrology and permafrost thaw<br>↓ Ice cover<br>↑ Permafrost thaw<br>↑ Suspended sediment and water turbidity<br>↑ Primary productivity | None identified                                                                                                                                    | POPs ↑ in sedimentary organic matter of slump-affected lakes<br><br>POPs ↑ in amphipods from slump-affected lakes                                                                                                                                                                                                                                                                                                                                         |
| Seasonality changes<br>↑ Earlier ice melt<br>↑ Open water season<br>↓ Later ice freeze up                                                          | None identified                                                                                                                                    | PCBs ↑ in later hatching geese eggs<br><br>POPs ↑↓ in zooplankton, fish and seabirds with seasonal changes in an Atlantic fjord                                                                                                                                                                                                                                                                                                                           |
| Ecological changes                                                                                                                                 |                                                                                                                                                    |                                                                                                                                                                                                                                                                                                                                                                                                                                                           |
| Increased primary production in marine and freshwater                                                                                              | ↓ bioaccumulation due to less bioavailability of dissolved POPs<br><br>Systematic ↓ bioaccumulation due to lower bioconcentration in phytoplankton |                                                                                                                                                                                                                                                                                                                                                                                                                                                           |
| Changing species interactions:<br>Marine-to-terrestrial prey shifts                                                                                | None identified                                                                                                                                    | ↓ 30% in CHL for Southern Beaufort Sea polar bears; decrease not reaching statistical significance for PCB, HCH, CIBz and increase not reaching statistical significance for DDT<br><br>↓ PCBs, OCPs, PBDEs, PFAS in Arctic foxes from Svalbard, but long term changes in diet did not affect temporal trends of POPs<br><br>↓ PCBs, OCPs, PBDEs, PFAS in polar bears from Svalbard, but long term changes in diet did not affect temporal trends of POPs |
| Changing species interactions:<br>Arctic to sub-Arctic prey shifts                                                                                 | None identified                                                                                                                                    | ↑ instead of ↓ trend for PCBs and CHLs in Western Hudson Bay polar bears, faster rate of ↑ for PBDEs and β-HCH, faster rate of ↓ for DDTs<br><br>Non-significant slower rate of ↓ for PCBs and CHLs in East Greenland polar bears, non-significant faster rate of ↑ of PBDEs. ↔ effect for HCB and DDTs<br><br>↑ biomagnification when transient/sub-Arctic species included in the food web                                                              |
| Changes in energy intake/ expenditure:<br>↑ Energy needs<br>↓ Body condition                                                                       | None identified                                                                                                                                    | ↑ POPs during incubation in eiders with low body condition<br><br>↑ POPs in polar bears and Arctic foxes from Svalbard, but long-term changes in body condition do not affect temporal trends of POPs<br><br>↑ POPs in polar bears in the Barents Sea<br><br>↓ Sea ice led to ↑ energy expenditure and ↑ Hg in seabirds due to more time flying, less time underwater, and deeper and longer dives                                                        |
| Changes in behavior and migration patterns                                                                                                         | ↑ Exposure expected due to migration and higher trophic level diet (i.e. elevated POP levels in migratory seabirds)                                | Delayed migration timing and routes affect contaminant transfer to offspring/eggs: heavier PCBs ↑                                                                                                                                                                                                                                                                                                                                                         |

AO: Arctic oscillation; CC: climate change; CHL: chlordane; CIBz: chlorobenzene; CEAC: chemical of emerging Arctic concern; DDT: dichlorodiphenyltrichloroethane; HCH: hexachlorocyclohexane; LRT: long-range transport; NAO: North Atlantic oscillation; OCP: organochlorine pesticide; PBDE: polybrominated diphenyl ether; PCB: polychlorinated biphenyl; PFAS: per- and polyfluoroalkyl substances; POP: persistent organic pollutant

| References                                                                                                                                                                                                           | Conclusions                                                                                                                                                                | Knowledge Gaps                                                                                                                                                                            |
|----------------------------------------------------------------------------------------------------------------------------------------------------------------------------------------------------------------------|----------------------------------------------------------------------------------------------------------------------------------------------------------------------------|-------------------------------------------------------------------------------------------------------------------------------------------------------------------------------------------|
| Eickmeyer et al., 2016                                                                                                                                                                                               | Findings based on limited studies from small lakes                                                                                                                         | Broader suite of lakes need to be studied                                                                                                                                                 |
| D'Onofrio, 2014                                                                                                                                                                                                      | Sedimentation of organic matter and particulates facilitate the delivery of associated POPs/CEACs from water column to benthic communities                                 |                                                                                                                                                                                           |
| Hitchcock et al., 2019a                                                                                                                                                                                              | Changes in seasonal timing may impact migration routes and/or relative time spent at more contaminated wintering grounds                                                   | Drivers of seasonal contaminant shifts in food webs (e.g. sea ice and meltwater) still unknown and are large confounding factors                                                          |
| Hallanger et al., 2011a,b,c                                                                                                                                                                                          | Seasonal effects may differ between POPs in relation to physiochemical properties (e.g. volatility, water solubility)                                                      |                                                                                                                                                                                           |
| Borgå et al., 2010                                                                                                                                                                                                   | Current understanding of the net effect of increasing primary production on contaminant accumulation is limited                                                            | Effects of regional boosts in primary production and biodilution are unknown<br>Little is known regarding the cascading effects on trophic interactions in the food web                   |
| Atwood et al., 2017                                                                                                                                                                                                  | Studies to date suggest a shift from marine to terrestrial prey is associated with decreasing POP levels                                                                   | Knowledge of the mechanisms and processes underpinning observed correlations is limited                                                                                                   |
| Andersen et al., 2015a<br>Routti et al., 2017<br>Vorkamp et al., this issue<br>Tartu et al., 2017a, b<br>Lippold et al., 2018<br>Routti et al., 2017                                                                 |                                                                                                                                                                            |                                                                                                                                                                                           |
| McKinney et al., 2009<br>McKinney et al., 2013<br>McKinney et al., 2012                                                                                                                                              | Difficult to conclude as effects appear to depend on the particular prey shift occurring and may be contaminant-specific                                                   | Effects of climate-related changes in food webs and species interactions on contaminant accumulation are largely unknown and would benefit from future application of modeling approaches |
| Bustnes et al., 2012<br>Baert et al., 2013<br>Tartu et al., 2017b<br>Andersen et al. 2015a<br>Lippold et al., 2018<br>Routti et al., 2017<br>Blévin et al. 2020<br>Amélineau et al., 2019<br>Elliott and Fernie 2019 | Difficult to conclude as most studies focus only on the relationship between body condition and POP levels (e.g. lipid depletion increasing POP concentrations)            | Understanding of the effects of climate-related changes in behavior and migration on POP/CEAC accumulation is limited                                                                     |
| Baert et al., 2013<br>Hitchcock et al., 2019a                                                                                                                                                                        | Models suggest higher POP concentrations in migrating seabirds<br>Behavior and migration changes lead to differences in diet and condition which affect POP/CEAC exposures |                                                                                                                                                                                           |

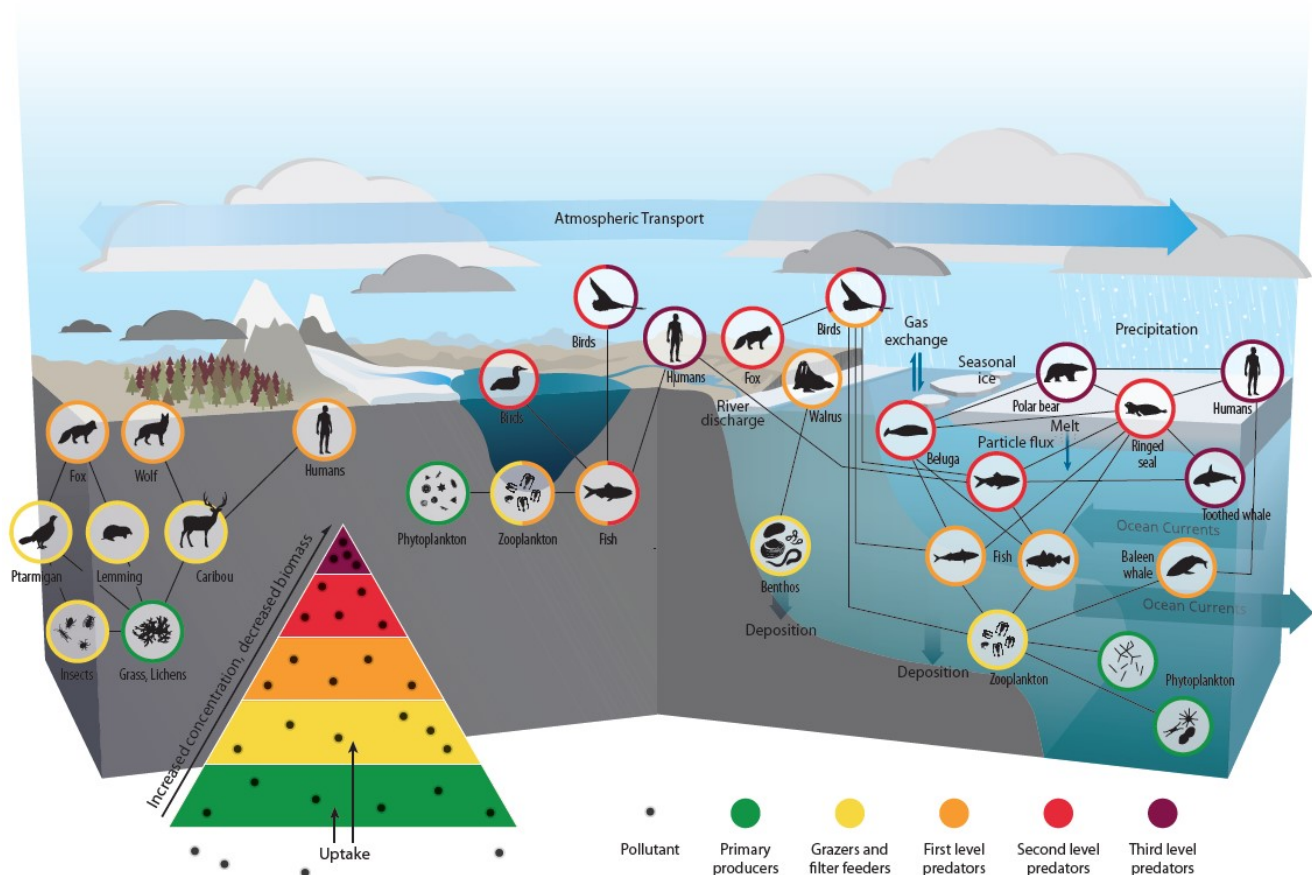

1 **Figure S1** Pictorial representation of the physical and ecological pathways of persistent organic  
 2 pollutants moving into and through the Arctic environment. Global climate change may influence the  
 3 depicted pathways, and in turn, the dynamics and fate of Arctic contaminants. Adapted from  
 4 Macdonald et al. (2005).

5

### 6 **Case Study S1: Effects of permafrost thaw on Arctic char condition**

7 Two lakes, East Lake and West Lake, on Melville Island in the central Canadian Arctic Archipelago  
 8 have been the subjects of a long-term study examining the effect of permafrost thaw and degradation  
 9 on lake water (Roberts et al., 2017). Since 2008, West Lake has been increasingly impacted by  
 10 permafrost degradation and subaqueous slumps, which together increased turbidity 50- to 100-fold  
 11 compared to the nearby East Lake by 2016 (Figure S2). Over this same time period, the physical  
 12 condition of the resident Arctic char in both lakes changed, as determined using condition factors (K), a  
 13 standard measure of fish health calculated using an individual's mass relative to its length. Whereas  
 14 condition factors increased in char from East Lake, they declined in char from the permafrost thaw-  
 15 impacted West Lake (Figure S2). With turbidity >100 times higher than the East Lake, visibility in

16 West Lake has been substantially reduced, limiting the ability of visual predators such as Arctic char to  
 17 feed, which likely explains the lake's declining fish condition. Alternatively, the increased fish  
 18 condition in East Lake may be due to warmer water temperatures and reduced ice cover, although this  
 19 requires further investigation. Analysis of carbon stable isotopes ( $\delta^{13}\text{C}$ ) and nitrogen stable isotopes  
 20 ( $\delta^{15}\text{N}$ ) showed that mean  $\delta^{13}\text{C}$  values ( $\pm$  SD) in adult char from East Lake ( $-27.27\pm 0.81$  ‰;  $n=98$ ) were  
 21 depleted compared to those of West Lake char ( $-24.73\pm 1.17$  ‰;  $n=97$ ), indicating greater terrestrial and  
 22 benthic carbon inputs to West Lake (Muir, unpubl. data). Also, mean  $\delta^{15}\text{N}$  values ( $\pm$  SD) were lower in  
 23 West Lake char ( $10.1\pm 0.98$  ‰) compared to those in East Lake char ( $11.2\pm 0.50$  ‰), suggesting  
 24 differences in food sources. By comparison, fish condition has not changed significantly in three of  
 25 four Arctic char populations in lakes of similar size on Cornwallis Island in the central Canadian Arctic  
 26 Archipelago (Figure S2) (Hudelson et al., 2019), despite similar warming temperatures, especially  
 27 during the period 2008 to 2012.

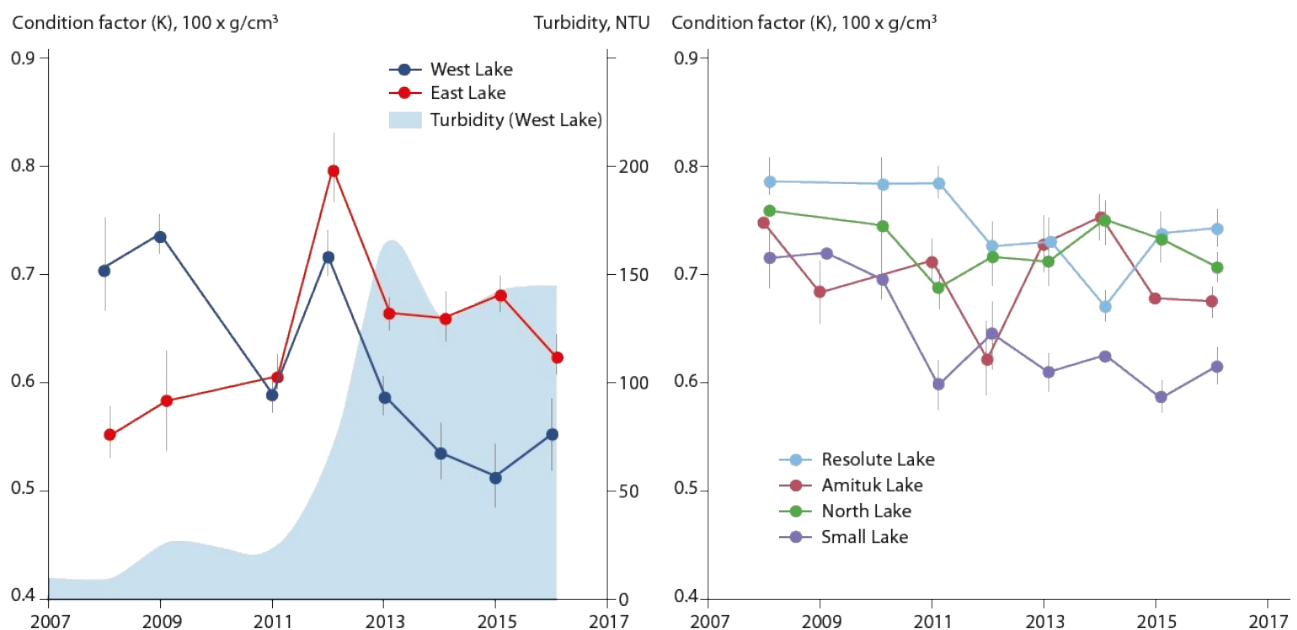

28  
 29 **Figure S2** Condition of land-locked Arctic char in Canadian lakes. (Left) Condition factors (K) ( $100 \times$   
 30  $\text{g}/\text{cm}^3$ ) for landlocked Arctic char in the clear East Lake and turbid West Lake (2008–2016). Turbidity  
 31 in West Lake is shown as a shaded background. Turbidity values in East Lake were  $< 5$  NTU and not  
 32 shown. Data from Roberts et al. (2017). (Right) Condition factors of adult Arctic char from four other  
 33 lakes on Cornwallis Island in the central Canadian Arctic Archipelago for comparison. Data from  
 34 Hudelson et al., (2019).

35 The physiological condition of Arctic char in Lake Hazen, the largest lake by volume north of the  
36 Arctic Circle, was also reported to have declined from 1981 to 2015 based on the overall trend in K  
37 values (Lehnherr et al., 2018). This trend also coincided with increased turbidity in the lake, arising  
38 from increased discharge of sediment-rich glacier-fed rivers, which was particularly apparent between  
39 2008–2013. However, it should be noted the conclusion of Lehnherr et al. (2018) – that ecological  
40 changes have resulted in a significant decline in the condition of Lake Hazen char – has been  
41 challenged, with independent statistical analysis of the dataset suggesting no significant trend exists  
42 (Moore et al., 2018). Nevertheless, trends in the phytoplankton ecology of Lake Hazen have also been  
43 observed based on paleolimnological studies, with the planktonic diatom, *Cyclotella sensu lato*,  
44 increasing in relative abundance and supplanting benthic species by the late 1990s, reflecting longer  
45 ice-free periods in the lake. Thus, the food web of Lake Hazen is undergoing changes, but further  
46 monitoring is needed to establish the effects on Arctic char, the lake’s top predator. Concentrations of  
47 lipid-normalized  $\Sigma$ PCBs and  $\Sigma$ DDTs in Arctic char in Lake Hazen declined over the period 2001–2015  
48 but were positively correlated with NAO conditions (Cabrerizo et al., 2018b; Vorkamp et al., this  
49 issue). However, trends of POPs in Arctic char in Lake Hazen were not related to the increased glacial  
50 discharge or turbidity.

51

52
